# Supplementary material for: Vague retellings of personal narratives in temporal lobe epilepsy
Source: bioRxiv or medRxiv preprint supplement (doi:10.1101/2022.10.24.22281484), 2022-10-26
Supplement: Supplementary file [file media-5.pdf]

## Appendix E

### *Partial Correlations*

Partial correlations, adjusting for age, were used to examine relationships between clinical characteristics and Trial 4 discourse variables where there were significant group differences: pause duration, production rate, fluency disruption, cohesion disruption, and non-progression to novel units. Seizure burden correlated significantly with disease duration ( $r = 0.89, p < .0001$ ), number of ASMs ( $r = 0.83, p < .0001$ ), time since last seizure ( $r = 0.78, p < .0001$ ), production rate ( $r = -0.37, p = .037$ ), pause duration ( $r = 0.54, p = .003$ ), disrupted cohesion ( $r = 0.44, p = .018$ ), fluency disruptors ( $r = 0.49, p = .008$ ), and proportion non-progression to novel units ( $r = 0.58, p = .0011$ ). Disease duration correlated with age at diagnosis ( $r = -0.91, p < .0001$ ), number of ASMs ( $r = 0.90, p < .0001$ ), time since last seizure ( $r = 0.78, p < .0001$ ), pause duration ( $r = 0.49, p = .009$ ), production rate ( $r = -0.48, p = .009$ ), fluency disruption ( $r = 0.55, p = .003$ ), cohesion disruption ( $r = 0.43, p = .021$ ), and proportion non-progression to novel units ( $r = 0.58, p = .0012$ ). Number of ASMs correlated with production rate ( $r = -0.54, p = .0035$ ), fluency disruptors ( $r = 0.55, p = .003$ ), cohesion disruptors ( $r = 0.42, p = .027$ ), and proportion non-progression to novel units ( $r = 0.60, p = .001$ ). Time since last seizure correlated with pause duration ( $r = 0.38, p = .043$ ), fluency disruptors ( $r = 0.59, p = .0009$ ), and proportion non-progression to novel units ( $r = 0.73, p < .0001$ ). Years of education correlated with estimated IQ ( $r = 0.74, p < .0001$ ). Production rate correlated with fluency disruption ( $r = -0.59, p = .0010$ ), while pause duration correlated with proportion of non-progression to novel units ( $r = 0.40, p = .035$ ). Fluency disruptors also correlated with the proportion of non-progression to novel units ( $r = 0.44, p = .020$ ). For these core variables, there were no other significant associations with demographic or seizure characteristics at Trial 4 when adjusting for age.
